# Supplementary material for: Impact of secondary ice production on thunderstorm electrification under different aerosol conditions
Source: Copernicus journal article supplement (doi:10.5194/egusphere-2024-2013), 2024-07-30
Supplement: Supplementary file [file egusphere-2024-2013-AC3-supplement.pdf]

Reviewer's comments are in black, and responses are in blue.

**General comments:**

Huang et al. present a detailed investigation into the role of secondary ice production (SIP) processes and aerosols in cloud electrification within thunderstorms. Utilizing the Weather Research and Forecasting (WRF) model with a spectral bin microphysics (SBM) scheme, this study examines how different SIP processes interact with varying cloud condensation nuclei (CCN) concentrations to influence cloud microphysics and charge separation. This topic is both timely and relevant, exploring key uncertainties in our understanding of cloud microphysics and electrification mechanisms under different aerosol conditions. Nevertheless, the manuscript requires substantial revisions to improve clarity and strengthen the validity of conclusions. The following specific comments and technical corrections should be addressed before the paper is considered for publication:

Reply: We appreciate your insightful comments. The paper has been revised accordingly and has been improved a lot. Please see our responses below.

**Specific comments:**

1. **In the abstract:** (i) Please be more precise when referring to terms like "clean" and "polluted" environments, as well as "relatively warm/cold temperatures," both in the abstract and throughout the manuscript. Explicitly define these terms or specify the aerosol conditions and temperature ranges you are referring to each time to avoid ambiguity. (ii) It would be beneficial to mention some implications of your findings within the abstract. For example, you could explain the importance of correctly capturing the charging reversal at different temperatures due to variations in aerosol concentrations or the inclusion of SIP. This would help readers understand the relevance and impact of your results. (iii) Finally, please define what is meant by the term "normal charge structure" (Line 29).

Reply: Thank you for your comment. (i) The aerosol conditions and temperature ranges have been clearly described to avoid ambiguity. (ii) The charging reversal at different temperatures is important because it affects the polarity of the charge acquired by the ice-phase particles during charge separation, which in turn affects the charge structure and the flash rate in the cloud. According to the analysis in this paper, it is known that the reversal temperature is affected by both aerosol concentration and SIP processes. It

implies the importance of aerosol and SIP processes for the charge structure and discharge process in clouds. (iii) The term “normal charge structure” is defined as “with an upper positive charge region and a lower negative region” in the abstract.

2. **Lines 41-52:** Here you mention the aerosol indirect effects in liquid clouds (cloud albedo and lifetime effect). Consider also discussing the indirect aerosol effects in mixed-phase clouds (MPCs; e.g., glaciation, riming and thermodynamic indirect effect in convective clouds). This is particularly relevant to your study, and these indirect effects could help explain some of the results you present (e.g., Lines 241-247 or 296-298).

Reply: Thank you for your comment. The indirect aerosol effects in mixed-phase clouds is discussed as follows: “*Aerosol also has significant impacts on the microphysics in mixed-phase region. According to previous studies, the increase in aerosol concentration reduces cloud droplet size, thus more small droplets can be lofted to mixed-phase region, which may enhance the freezing of cloud droplets and facilitate cold rain process (Rosenfeld and Woodley, 2000; Rosenfeld et al., 2008; Hoose et al., 2010; Sherwood, 2002; Jiang et al., 2008). The increase in CCN condensation may also intensify the hail growth through riming in convective clouds (Chen et al., 2010), and the enhanced ice growth rate may produce more latent heat, which in turn invigorate the convections (Khain et al., 2005; Wang, 2005).*”.

#### References:

- Cheng, C.-T., Wang, W.-C., and Chen, J.-P.: Simulation of the effects of increasing cloud condensation nuclei on mixed-phase clouds and precipitation of a front system, *Atmospheric Research*, 96, 461–476, <https://doi.org/10.1016/j.atmosres.2010.02.005>, 2010.
- Hoose, C., Kristjánsson, J. E., and Burrows, S. M.: How important is biological ice nucleation in clouds on a global scale?, *Environ. Res. Lett.*, 5, 024009, <https://doi.org/10.1088/1748-9326/5/2/024009>, 2010.
- Jiang, J. H., Su, H., Schoeberl, M. R., Massie, S. T., Colarco, P., Platnick, S., and Livesey, N. J.: Clean and polluted clouds: Relationships among pollution, ice clouds, and precipitation in South America, *Geophysical Research Letters*, 35, 2008GL034631, <https://doi.org/10.1029/2008GL034631>, 2008.

Khain, A., Rosenfeld, D., and Pokrovsky, A.: Aerosol impact on the dynamics and microphysics of deep convective clouds, Q. J. R. Meteorol. Soc., 131, 2639–2663, <https://doi.org/10.1256/qj.04.62>, 2005.

Sherwood, S. C.: Aerosols and Ice Particle Size in Tropical Cumulonimbus, J. Climate, 15, 1051–1063, [https://doi.org/10.1175/1520-0442\(2002\)015<1051:AAIPSI>2.0.CO;2](https://doi.org/10.1175/1520-0442(2002)015<1051:AAIPSI>2.0.CO;2), 2002.

Wang, C.: A modeling study of the response of tropical deep convection to the increase of cloud condensation nuclei concentration: 1. Dynamics and microphysics, J. Geophys. Res., 110, 2004JD005720, <https://doi.org/10.1029/2004JD005720>, 2005.

3. **Lines 54-63:** Before discussing the results from various model simulations, it would be beneficial to provide a brief introduction to SIP. Additionally, introducing Primary Ice Production (PIP) as a prerequisite for SIP would clarify the mechanisms by which an increased presence of cloud droplets promotes ice formation in MPCs.

Reply: Thank you for your valuable comment. The relative contents are added as follows: *“The production of ice crystals in thunderstorm clouds is complicated, in mixed-phase region, the heterogeneous nucleation, which depends on ice nucleating particles (INP), provides the primary ice. However, it is found that the primary ice production (PIP) is insufficient to explain the observed high ice concentration in convective clouds (Hobbs, 1969; Hobbs and Rangno, 1985; Koenig, 1963). Secondary ice production (SIP) is recognized as a major contributor to the fast ice generation at temperatures warmer than the homogeneous freezing temperature (Hallett and Mossop, 1974; Mossop and Hallett, 1974; Santachiara et al., 2014; Korolev 2020). There are several different mechanisms of SIP proposed by previous studies, such as ice splintering during riming (Hallett and Mossop, 1974), shattering of drops during freezing (Gagin, 1972; Pruppacher and Schlamp, 1975; Kolomeychuk et al., 1975), ice-ice collisional breakup (Schwarzenboeck et al., 2009), and ice sublimation breakup (Bacon et al., 1998; Dong et al., 1994; Oraltay and Hallett, 1989). The ice concentration produce by SIP processes are orders of magnitude than PIP, but PIP is a prerequisite for SIP, and changes in PIP (e.g., induced by increasing aerosol concentration) can affect the SIP processes (Sullivan et al., 2018).*

References:

- Bacon, N. J., Swanson, B. D., Baker, M. B., and Davis, E. J.: Breakup of levitated frost particles, *J. Geophys. Res.*, 103, 13763–13775, <https://doi.org/10.1029/98JD01162>, 1998.
- Dong, Y., Oraltay, R. G., and Hallett, J.: Ice particle generation during evaporation, *Atmospheric Research*, 32, 45–53, [https://doi.org/10.1016/0169-8095\(94\)90050-7](https://doi.org/10.1016/0169-8095(94)90050-7), 1994.
- Gagin, A.: The Ice Phase in Winter Continental Cumulus Clouds, *J. Atmos. Sci.*, 32, 1604–1614, [https://doi.org/10.1175/1520-0469\(1975\)032<1604:TIPIWC>2.0.CO;2](https://doi.org/10.1175/1520-0469(1975)032<1604:TIPIWC>2.0.CO;2), 1975.
- Hallett, J. and Mossop, S. C.: Production of secondary ice particles during the riming process, *Nature*, 249, 26 – 28, <https://doi.org/10.1038/249026a0>, 1974.
- Hobbs, P. V.: Ice Multiplication in Clouds, *J. Atmos. Sci.*, 26, 315–318, [https://doi.org/10.1175/1520-0469\(1969\)026<0315:IMIC>2.0.CO;2](https://doi.org/10.1175/1520-0469(1969)026<0315:IMIC>2.0.CO;2), 1969.
- Hobbs, P. V. and Rangno, A. L.: Ice Particle Concentrations in Clouds, *J. Atmos. Sci.*, 42, 2523–2549, [https://doi.org/10.1175/1520-0469\(1985\)042<2523:IPCIC>2.0.CO;2](https://doi.org/10.1175/1520-0469(1985)042<2523:IPCIC>2.0.CO;2), 1985.
- Koenig, L. R.: The Glaciating Behavior of Small Cumulonimbus Clouds, *J. Atmos. Sci.*, 20, 29–47, [https://doi.org/10.1175/1520-0469\(1963\)020<0029:TGBOSC>2.0.CO;2](https://doi.org/10.1175/1520-0469(1963)020<0029:TGBOSC>2.0.CO;2), 1963.
- Kolomeychuk, R. J., McKay, D. C., and Iribarne, J. V.: The Fragmentation and Electrification of Freezing Drops, *J. Atmos. Sci.*, 32, 974–979, [https://doi.org/10.1175/1520-0469\(1975\)032<0974:TFAEOF>2.0.CO;2](https://doi.org/10.1175/1520-0469(1975)032<0974:TFAEOF>2.0.CO;2), 1975.
- Korolev, A. and Leisner, T.: Review of experimental studies of secondary ice production, *Atmos. Chem. Phys.*, 20, 11767–11797, <https://doi.org/10.5194/acp-20-11767-2020>, 2020.
- Mossop S. C. and Hallett J.: Ice Crystal Concentration in Cumulus Clouds: Influence of the Drop Spectrum, *Science*, 186, 632 – 634, <https://doi.org/10.1126/science.186.4164.632>, 1974.
- Oraltay, R. G. and Hallett, J.: Evaporation and melting of ice crystals: A laboratory study, *Atmospheric Research*, 24, 169–189, [https://doi.org/10.1016/0169-8095\(89\)90044-6](https://doi.org/10.1016/0169-8095(89)90044-6), 1989.

- Pruppacher, H. R. and Schlamp, R. J.: A wind tunnel investigation on ice multiplication by freezing of waterdrops falling at terminal velocity in air, *J. Geophys. Res.*, 80, 380–386, <https://doi.org/10.1029/JC080i003p00380>, 1975.
- Santachiara, G., Belosi, F., and Prodi, F.: The Mystery of Ice Crystal Multiplication in a Laboratory Experiment, *Journal of the Atmospheric Sciences*, 71, 89 – 97, <https://doi.org/10.1175/JAS-D-13-0117.1>, 2014.
- Schwarzenboeck, A., Shcherbakov, V., Lefevre, R., Gayet, J.-F., Pointin, Y., and Durore, C.: Indications for stellar-crystal fragmentation in Arctic clouds, *Atmospheric Research*, 92, 220–228, <https://doi.org/10.1016/j.atmosres.2008.10.002>, 2009.
- Sullivan, S. C., Hoose, C., Kiselev, A., Leisner, T., and Nenes, A.: Initiation of secondary ice production in clouds, *Atmos. Chem. Phys.*, 18, 1593–1610, <https://doi.org/10.5194/acp-18-1593-2018>, 2018.

4. **Section 2.1:** You should explicitly state that the case study discussed in this manuscript is essentially the same as in Huang et al. (2024). Clearly link this study to your previous work, explaining how it builds upon earlier findings to examine the sensitivity of results to varying CCN concentrations. Notably, the highest CCN concentration tested in this study (i.e.,  $4000\text{ cm}^{-3}$ ) is the same as in the Huang et al. (2024) paper. Given that the sublimational break-up mechanism is found to be inefficient (as evidenced by the orders-of-magnitude difference shown in Figure 9), the primary results from this study should be comparable to those from your previous work, particularly for the SBM-3SIP simulation (e.g., compare Fig. 13l of this manuscript to Fig. 13d of the Huang et al. (2024) paper). However, there is little discussion comparing the two papers, and the specific innovation being tested in this new paper is not clearly articulated.

Reply: Thank you for your comment. In Section 2.1, more information about this case is declared: “*The squall line investigated here is the same as that in Huang et al. (2024), which focuses on the cloud microphysics and electrification in an environment with high aerosol concentration. Previous studies found that that the rime splintering process, one of the SIP processes, could be affected by aerosol concentration (Tan et al., 2015; Mansell and Ziegler, 2013). Based on these studies, it is interesting to investigate the impact of different SIP processes under different aerosol conditions.*”

The comparison of 4SIP-4000 experiment in this paper and 3SIP experiment in Huang et al. (2024) are shown below: *“Since the impact of sublimational breakup of ice is minor, the modelled charge structure using 4 SIP processes is comparable to that simulated using 3 SIP processes (without SK) in Huang et al. (2024).*

#### References:

Huang, S., Jing, X., Yang, J., Zhang, Q., Guo, F., Wang, Z., and Chen, B.: Modeling the Impact of Secondary Ice Production on the Charge Structure of a Mesoscale Convective System, JGR Atmospheres, 129, e2023JD039303, <https://doi.org/10.1029/2023JD039303>, 2024.

Mansell, E. R. and Ziegler, C. L.: Aerosol Effects on Simulated Storm Electrification and Precipitation in a Two-Moment Bulk Microphysics Model, Journal of the Atmospheric Sciences, 70, 2032–2050, <https://doi.org/10.1175/JAS-D-12-0264.1>, 2013.

Tan, Y. B., Shi, Z., Chen, Z. L., Peng, L., Yang, Y., Guo, X. F., and Chen, H. R.: A numerical study of aerosol effects on electrification of thunderstorms, Journal of Atmospheric and Solar-Terrestrial Physics, 154, 236–247, <https://doi.org/10.1016/j.jastp.2015.11.006>, 2015.

5. **Figure 1:** Clarify whether the maps presented here are generated from WRF simulations. If so, have you evaluated the meteorological fields against any available observations? If this was done in previous work, please mention it explicitly.

Reply: Thank you for your valuable comment. The data used to plot Fig. 1 in the manuscript is FNL reanalysis data, this is now clarified in the revised paper.

6. **Section 2.2.1:** This paragraph is quite lengthy; consider breaking it into smaller sections for better readability. I suggest either reordering the content to begin with the Model Setup (Section 2.2.3) or, when referencing the "two domains" of WRF (Line 118), guiding readers to the relevant domains shown in Figure 2. Additionally, please include the following details in this section: (i) specify the number of ice and liquid species included in the scheme; (ii) in Line 123, clearly state the assumed value of "k" in the Twomey slope; (iii) provide a more detailed reference to the Primary Ice Production (PIP) scheme used, as any overestimation of primary ice crystals could

diminish the perceived significance of SIP. Have you observed any changes in PIP rates with varying CCN concentrations? (iv) For the SIP implementation, it would be more effective to refer to your previous work (e.g., Yang et al., 2024) rather than the original parameterization papers, and to emphasize key assumptions made in this study (e.g., what was the rimed fraction and ice habit assumed for the involved ice species, above which raindrop diameter did you allow droplet-shattering to occur?).

Reply: Thank you for your comment. The Section 2.2.1 has been divided into two paragraphs for better readability. The first one describes the Fast-SBM scheme and the second one describes four SIP mechanisms. “two-domain” should not appear here and it is removed in the revised paper. The following details are added in this section: (i) The Fast-SBM scheme describes size distributions of three types of hydrometeors: water droplets (cloud droplets and rain drops), low density solid particles (ice/snow), high density solid particles (graupel/hail). (ii) The slope value in the Twomey equation is set as 0.4. (iii) The Fast-SBM scheme has three main Primary Ice Production (PIP) mechanisms including deposition/condensation nucleation, contact nucleation (Meyers et al., 1992), and immersion freezing (Vali, 1975). It is noted that PIP rates change with varying CCN concentrations. In this paper, as CCN concentration increase, more small ice form at higher levels, and the graupel contents decrease, consistent with previous studies (Khain et al., 2005; Tan et al., 2015; Barthlott et al., 2022; Yang et al., 2024b). (iv) The implement of four SIP processes in the Fast-SBM scheme is described in detail in Yang et al. (2024). In the ice-ice collisional breakup mechanism, the rimed fraction is 0.2 and the ice habit follows the Phillips et al. (2017). In the shattering of freezing drops mechanism, the threshold of raindrop diameter (0.15 mm) for shattering to occur is determined based on Phillips et al. (2018).

#### References:

- Barthlott, C., Zarboon, A., Matsunobu, T., and Keil, C.: Importance of aerosols and shape of the cloud droplet size distribution for convective clouds and precipitation, *Atmos. Chem. Phys.*, 22, 2153–2172, <https://doi.org/10.5194/acp-22-2153-2022>, 2022.
- Khain, A., Rosenfeld, D., and Pokrovsky, A.: Aerosol impact on the dynamics and microphysics of deep convective clouds, *Q. J. R. Meteorol. Soc.*, 131, 2639–2663, <https://doi.org/10.1256/qj.04.62>, 2005.



Meyers, M. P., DeMott, P. J., and Cotton, W. R.: New Primary Ice-Nucleation Parameterizations in an Explicit Cloud Model, *J. Appl. Meteor.*, 31, 708–721, [https://doi.org/10.1175/1520-0450\(1992\)031<0708:NPINPI>2.0.CO;2](https://doi.org/10.1175/1520-0450(1992)031<0708:NPINPI>2.0.CO;2), 1992.

Vali, G.: Remarks on the mechanism of atmospheric ice nucleation. *Proceedings of the Eighth International Conference on Nucleation*, II. Gaivoronsky, Ed., Gidrometeoizdat, 265–269, 1975.

Yang, Y., Sun, J. M., Shi, Z., Tian, W. S., Li, F. X., Zhang, T. Y., Deng, W., Hu, W., and Zhang, J.: The Preliminary Application of Spectral Microphysics in Numerical Study of the Effects of Aerosol Particles on Thunderstorm Development, *Remote Sensing*, 16, 2117, <https://doi.org/10.3390/rs16122117>, 2024b.

7. **Section 2.2.3:** Please justify the chosen range of CCN concentrations in your simulations (Line 198). Are these values based on literature or measurements or random? The title for Table 1 should also be more descriptive.

Reply: Thank you for your comment. Qu et al. (2017) conduct simulation for the similar area as us and set  $N_0$  as  $4000 \text{ cm}^{-3}$ . Previous studies indicated that the trend of change in the simulation results turns significantly around  $N_0=1000 \text{ cm}^{-3}$  and  $N_0=2000 \text{ cm}^{-3}$  (Mansell and Ziegler, 2013; Shi et al., 2019). Besides, it is also necessary to set  $N_0$  to less than  $1000 \text{ cm}^{-3}$  to represent clean condition (Mansell and Ziegler, 2013).

#### References:

Qu, Y., Chen, B., Ming, J., Lynn, B. H., and Yang, M.-J.: Aerosol Impacts on the Structure, Intensity, and Precipitation of the Landfalling Typhoon Saomai (2006): Aerosol Impacts on Typhoon Saomai (2006), *J. Geophys. Res. Atmos.*, 122, 11,825–11,842, <https://doi.org/10.1002/2017JD027151>, 2017.

Mansell, E. R. and Ziegler, C. L.: Aerosol Effects on Simulated Storm Electrification and Precipitation in a Two-Moment Bulk Microphysics Model, *Journal of the Atmospheric Sciences*, 70, 2032–2050, <https://doi.org/10.1175/JAS-D-12-0264.1>, 2013.

Shi, Z., Li, L., Tan, Y., Wang, H., and Li, C.: A Numerical Study of Aerosol Effects on Electrification with Different Intensity Thunderclouds, *Atmosphere*, 10, 508, <https://doi.org/10.3390/atmos10090508>, 2019.

8. **Figure 3:** It appears that the simulated squall line is slightly "shifted" compared to



the radar observations. Is the observation panel identical to the one presented in Figure 3a of the Huang et al. (2024) paper? While I understand that it is challenging to achieve perfect alignment in the spatial extent and timing of the system in the model, I wonder if you have considered using a different forcing dataset besides the FNL reanalysis. Is this dataset the most widely used and validated for modeling studies in this particular region?

Reply: Thank you for your valuable comment. Despite the deviation between the observed and simulated values, the simulation results well reproduce the macro-morphology, the occurrence location, and the eastward tendency of this squall line. The observed result is the same as Huang et al. (2024). For the southeastern coast of China, both FNL (Guo et al., 2017; Qu et al., 2017) and ERA5 (Gong et al., 2024; Wang et al., 2023) data are widely used in numerical simulations. Based on your suggestion, we compare the simulated radar reflectivity of these two data. Figure R1 shows that simulated radar reflectivity from 4SIP-4000 experiment with ERA5 reanalysis data. It is noted that simulation results obtained for FNL and ERA5 data are similar. Therefore, FNL data is kept for use in this paper.

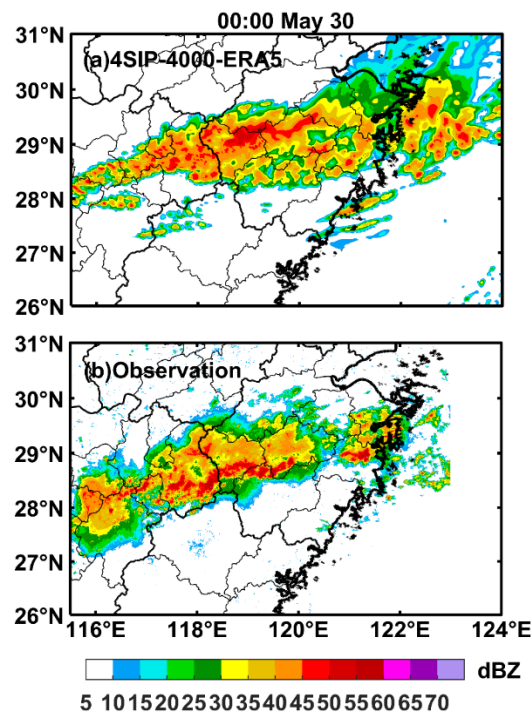

Figure R1. (a) The simulated radar reflectivity from 4SIP-4000 experiment with ERA5 reanalysis data. (b) The observed radar reflectivity.

References:

- Gong, Y., Liu, Z., Yu, S., Chan, P. W., and Hon, K. K.: Improving GNSS PPP Performance in the South China Under Different Weather Conditions by Using the Weather Research and Forecasting (WRF) Model - Derived Wet Delay Corrections, *Earth and Space Science*, 11, e2023EA003136, <https://doi.org/10.1029/2023EA003136>, 2024.
- Guo, F., Li, Y., Huang, Z., Wang, M., Zeng, F., Lian, C., and Mu, Y.: Numerical simulation of 23 June 2016 Yancheng City EF4 tornadic supercell and analysis of lightning activity, *Sci. China Earth Sci.*, 60, 2204–2213, <https://doi.org/10.1007/s11430-017-9109-8>, 2017.
- Huang, S., Jing, X., Yang, J., Zhang, Q., Guo, F., Wang, Z., and Chen, B.: Modeling the Impact of Secondary Ice Production on the Charge Structure of a Mesoscale Convective System, *JGR Atmospheres*, 129, e2023JD039303, <https://doi.org/10.1029/2023JD039303>, 2024.
- Qu, Y., Chen, B., Ming, J., Lynn, B. H., and Yang, M.-J.: Aerosol Impacts on the Structure, Intensity, and Precipitation of the Landfalling Typhoon Saomai (2006): Aerosol Impacts on Typhoon Saomai (2006), *J. Geophys. Res. Atmos.*, 122, 11,825–11,842, <https://doi.org/10.1002/2017JD027151>, 2017.
- Wang, X., Wang, W., He, Y., Zhang, S., Huang, W., Woolway, R. I., Shi, K., and Yang, X.: Numerical simulation of thermal stratification in Lake Qiandaohu using an improved WRF-Lake model, *Journal of Hydrology*, 618, 129184, <https://doi.org/10.1016/j.jhydrol.2023.129184>, 2023.
- Yang, J., Huang, S., Yang, T., Zhang, Q., Deng, Y., and Liu, Y.: Impact of ice multiplication on the cloud electrification of a cold-season thunderstorm: a numerical case study, *Atmos. Chem. Phys.*, 24, 5989–6010, <https://doi.org/10.5194/acp-24-5989-2024>, 2024.

9. **Figure 4:** could you please explain why you focused the statistical analysis on the four-hour period between 00:00 and 04:00 on May 30, given that the stated period of interest is between 16:00 UTC on May 29 and 06:00 UTC on May 30, 2022. It might be more insightful to compare median profiles and/or additional quantiles of the simulated reflectivity, as these could provide a better understanding of the distribution of simulated values. Additionally, have you conducted any statistical tests to determine whether the observed differences between the sensitivity simulations are statistically

significant?

Reply: Thank you for your valuable comment. The reason we focused on 00:00 to 04:00 on May 30 is that we only have observations for this period of time. According to Referee1's suggestion, the 4SIP-4000 experiment is set as a control experiment and comparison of observed data and simulated data from 4SIP-4000 experiment is used for model validation. Based on statistical results in Fig. 4, the average bias between simulated (4SIP-4000 experiment) and observed reflectivity is 13.1%. The radar reflectivity bias that is less than 15 dBZ reaches 67%, 71%, and 67% at 00:00, 02:00 and 04:00, respectively. The mean absolute errors of reflectivity at 00:00, 02:00 and 04:00 are 12 dBZ, 11 dBZ and 12 dBZ, respectively. In the revised paper, we only compare the observation with 4SIP-4000, it seems the CFAD does not provide more useful information for model validation, so we removed this figure, but we add the quantitative results of statistical tests in the text.

10. **Lines 226-227:** Could you clarify why increased CCN concentrations worsen the agreement with observed radar reflectivities? This appears to contradict the statement in Line 216 that the highest CCN concentration ( $4000 \text{ cm}^{-3}$ ) is the most realistic for this case study.

Reply: Thank you for your comment, and sorry for the confusing statement. 4SIP-4000 experiment, in which CCN concentration is  $4000 \text{ cm}^{-3}$  and all SIP processes are used, give the most realistic results. Here, we meant if no SIP is considered, increasing CCN concentration from  $400 \text{ cm}^{-3}$  to  $4000 \text{ cm}^{-3}$  (which is more appropriate for southeast China) cannot improve the simulation. This is now clarified in the revised paper.

11. **Line 239:** Please specify how "The results are averaged over the cloud at different heights" was achieved. Did you average spatially over model grids representing the squall line, and what criteria did you use to identify in-cloud grids?

Reply: Thank you for your comment. We apologize for not explaining it clearly. In this paper, we average the in-cloud area, which is identified using a total mixing ratio (including all hydrometeors) greater than  $10^{-6} \text{ g/kg}$ .

12. **Line 252:** Please consider defining the CCN thresholds distinguishing "clean" versus "polluted" cases in the Methodology section, and use this distinction consistently throughout the text.

Reply: Thank you for your valuable comment. We apologize for not explaining it clearly. The aerosol concentrations ( $N_0$ ) for polluted and clean condition have been clearly described over the whole paper to avoid ambiguity. In this paper, “clean” generally means  $N_0=400\text{ cm}^{-3}$  and “polluted” means  $N_0 \geq 2000\text{ cm}^{-3}$ .

13. **Line 253-254:** If the shattering of freezing drops is the most important SIP process to ice production at relatively warm subzero temperatures, would this not reduce the number or mass concentration of big raindrops within those temperature ranges?

Reply: Thank you for your comment. As shown in Fig. 10 in the revised manuscript, when  $N_0$  is less than  $2000\text{ cm}^{-3}$ , the shattering of freezing drops produces the most secondary ice between  $0\text{ }^{\circ}\text{C}$  and  $-10\text{ }^{\circ}\text{C}$ . As shown in [Table R1](#), it is seen that the addition of the shattering of freezing drops process could decrease the rain mixing ratio and concentration between  $0\text{ }^{\circ}\text{C}$  and  $-10\text{ }^{\circ}\text{C}$ . This information is added in the paper (text only).

Table R1. The difference in mean rain mixing ratio and number concentration between noSIP experiment and SD experiment (SD-noSIP) at  $0^{\circ}\text{C}$  to  $-10^{\circ}\text{C}$ .

| $N_0$ | Mixing ratio | Number concentration |
|-------|--------------|----------------------|
| 400   | -60.57%      | -43.57%              |
| 1000  | -75.34%      | -62.31%              |
| 2000  | -99.42%      | -75.87%              |
| 4000  | -59.88%      | -37.99%              |

14. **Figure 6:** Confirm whether the mean vertical profiles in this figure correspond to the same period shown in Figure 5. Additionally, have you tried to use logarithmic scale for the horizontal axes showing the number concentration of particles in this figure?

Reply: Thank you for your comment. These two figures in the revised manuscript share the same period. Figure R2 uses the logarithmic scale on the horizontal axes. In our opinion, the linear scale in the original figure better reveals the difference among different experiments. For example, the difference of graupel number concentration among the four experiments is more pronounced using liner scale axis.

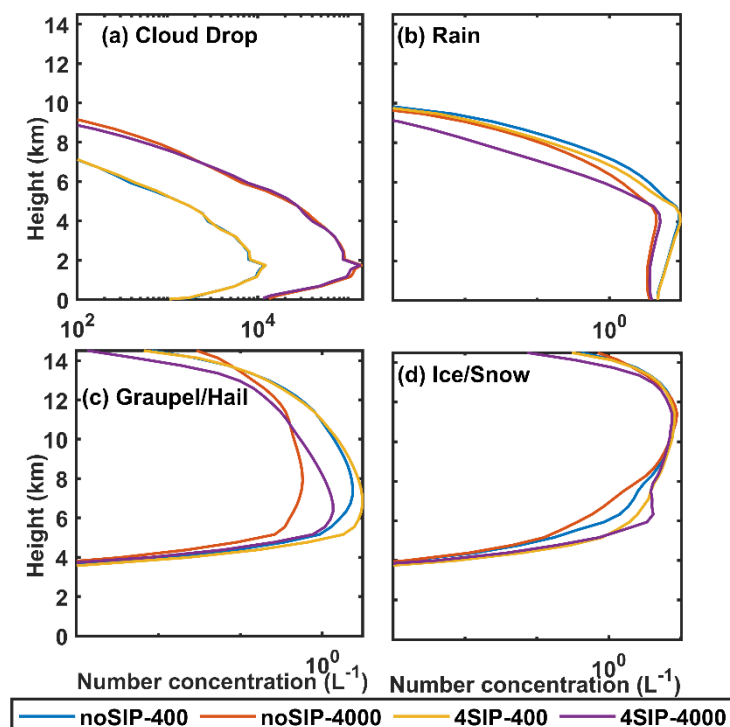

Figure R2. The vertical profiles of mean concentration for (a) cloud drop, (b) rain, (c) graupel/hail and (d) ice/snow from noSIP-400, noSIP-4000, 4SIP-400 and 4SIP-4000 experiment. The horizontal axes are logarithmic scale.

15. **Figure 7:** This figure appears overly complex, potentially obscuring key insights from your sensitivity experiments. Please consider reducing the number of sensitivities discussed in the main paper or discussing any plateau or asymptotic behavior as CCN concentrations increase. A logarithmic vertical axis might also be beneficial in this figure. Is there an issue with the y-axis in Figure 7b?

Reply: Thank you for your comment. According to your suggestion, the figure is revised and the y-axis in (b) is modified. Now only noSIP and 4SIP results are shown in the figure (Fig. R3). In fact, we only discussed noSIP and 4SIP results in the original paper, so the text remains similar. We tried using logarithmic vertical axis but in our opinion the linear scale in the original figure better reveals the difference among different experiments.

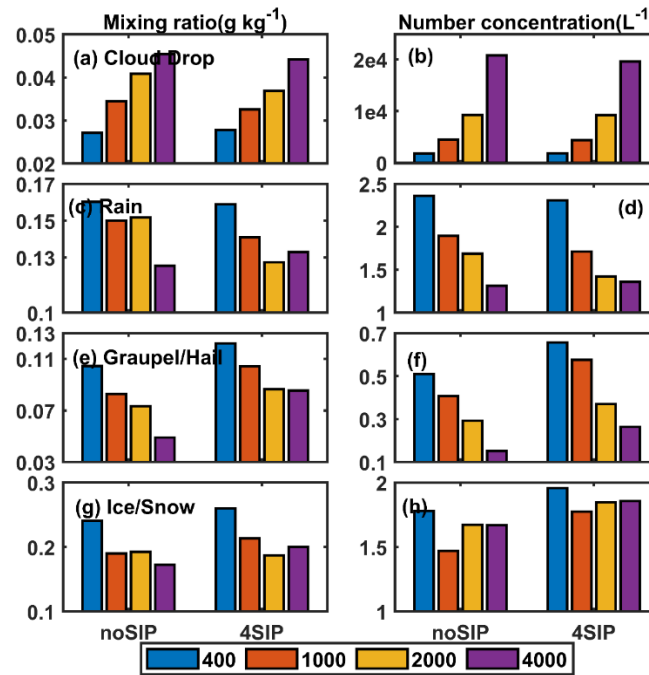

Figure R3. The time-domain-averaged mixing ratios (a, c, e, g) and number concentrations (b, d, f, h) of (a, b) cloud drop, (c, d) rain, (e, f) graupel/hail and (g, h) ice/snow from 8 sensitivity experiments.

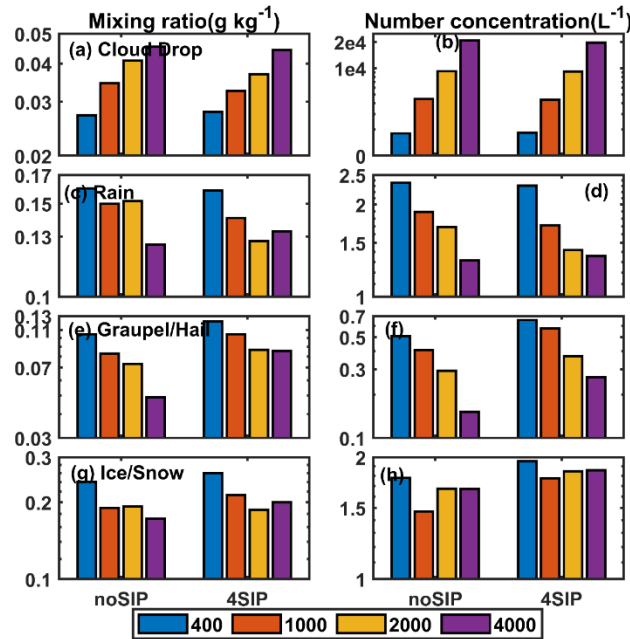

Figure R4. The same as Fig. R3, but the vertical axis are logarithmic.

16. **Line 285-286:** Have you examined how SIP rates vary with changes in CCN concentrations?

Reply: Thank you for your valuable comment. Yes, the secondary ice production rate of four SIP processes has been discussed in Fig. 9 (Fig. R5 here) in the original manuscript.

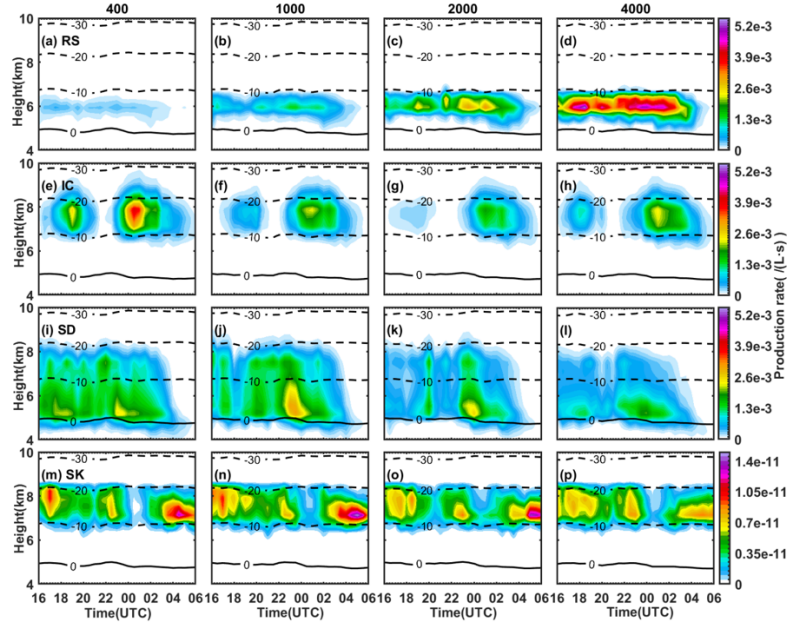

Figure R5. Time-height revolution of secondary ice production rate of four mechanisms of SIP. (a-d) rime-splintering process (RS); (e-h) ice-ice collisional breakup (IC); (i-l) freezing drop shattering (SD) and (m-p) sublimational breakup (SK). The first to fourth column indicate  $N_0=400, 1000, 2000, 4000 \text{ cm}^{-3}$ , respectively.

17. **Line 313 and Figure 9:** Please elaborate on why IC is most significant within the  $-10^\circ\text{C}$  to  $-20^\circ\text{C}$  temperature range. The enhanced efficiency of IC within the so-called dendritic growth layer is discussed in von Terzi et al. (2022) and Georgakaki et al. (2024). Did you implement both IC formulations from Table 1 of Phillips et al. (2017) for dendritic and spatial planar ice crystal habits? If so, was the selection of ice habit based on temperature? This should be further clarified in Section 2.2.1, as it might help explain the results discussed here. Also, please consider using a logarithmic scale for the colorbar in this figure.

Reply: Thank you for your comment. As shown in Von Terzi et al. (2022) and Georgakaki et al. (2024), collision of dendritic ice is the reason for enhanced IC process between  $-10^\circ\text{C}$  and  $-20^\circ\text{C}$ . The greater ice number concentration between  $-10^\circ\text{C}$  and  $-20^\circ\text{C}$  favors the ice collision, while smaller size of ice above  $-20^\circ\text{C}$  isotherm is unfavorable for the collision between the ice.



Yes, we do implement both IC formulations from Table 1 of Phillips et al. (2017) for dendritic and spatial planar ice crystal habits. Since the fast-SBM does not separate different ice habits, the selection of ice habit is simply based on temperature. Ice is assumed to be dendritic between  $-12^{\circ}\text{C}$  and  $-17^{\circ}\text{C}$  and is spatial planar ice between  $-40^{\circ}\text{C}$  and  $-17^{\circ}\text{C}$  as well as between  $-9^{\circ}\text{C}$  and  $-12^{\circ}\text{C}$ .

Figure R6 is the same as Fig. 9 in the original manuscript, but the colorbars have logarithmic scales. In our opinion, the main difference of production rates is clearer with liner colobar axis than logarithmic colobar.

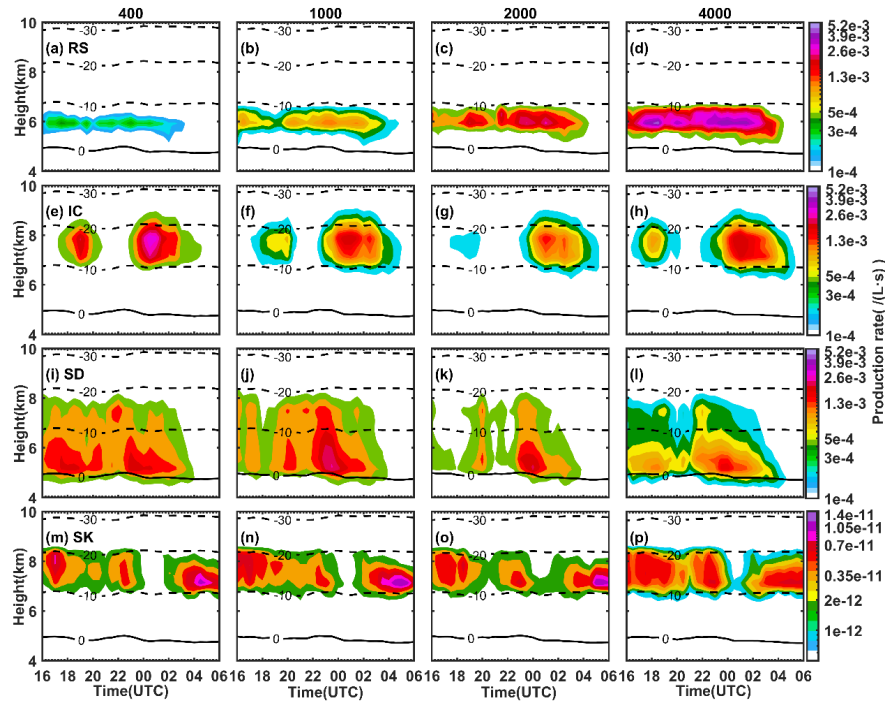

Figure R6. Time-height evolution of secondary ice production rate of four mechanisms of SIP. (a-d) rime-splintering process (RS); (e-h) ice-ice collisional breakup (IC); (i-l) freezing drop shattering (SD) and (m-p) sublimational breakup (SK). The first to fourth column indicate  $N_0=400, 1000, 2000, 4000 \text{ cm}^{-3}$ , respectively. The colorbars have logarithmic scales.

#### Reference:

Georgakaki, P., Billault-Roux, A.-C., Foskinis, R., Gao, K., Sotiropoulou, G., Gini, M., Takahama, S., Eleftheriadis, K., Papayannis, A., Berne, A. and Nenes, A.: Unraveling ice multiplication in winter orographic clouds via in-situ observations,

remote sensing and modeling, npj Clim. Atmos. Sci., 7(1), doi:10.1038/s41612-024-00671-9, 2024.

Khain, Leung, L. R., Lynn, B., and Ghan, S.: Effects of aerosols on the dynamics and microphysics of squall lines simulated by spectral bin and bulk parameterization schemes, J. Geophys. Res., 114, D22203, <https://doi.org/10.1029/2009JD011902>, 2009.

Phillips, Vaughan, T. J., Yano, Jun-Ichi, Khain, and Alexander.: Ice Multiplication by Breakup in Ice-Ice Collisions. Part I: Theoretical Formulation., Journal of the Atmospheric Sciences, 2017.

Von Terzi, L., Dias Neto, J., Ori, D., Myagkov, A. and Kneifel, S.: Ice microphysical processes in the dendritic growth layer: a statistical analysis combining multi-frequency and polarimetric Doppler cloud radar observations, Atmos. Chem. Phys., 22(17), 11795–11821, doi:10.5194/acp-22-11795-2022, 2022.

18. **Line 314 and Figure 9c-d:** Shouldn't the production rate due to RS zero outside of the -3 °C and -8 °C temperature range?

Reply: Thank you for your comment. Since the temperature contours in the time-height plot are obtained by taking the mean value, there is inevitably a bias. In order to better show the distribution of production rates, the cross-section plot is shown. As can be clearly seen in Figure R7, the generation rate is restricted to between -3°C and -8°C.

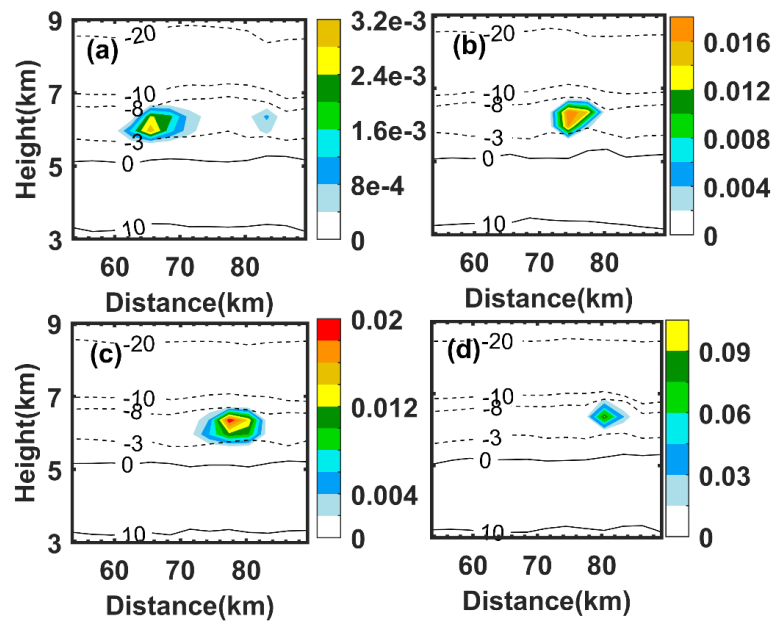

Figure R7. The cross-section of production rate of rime splintering process. (a)  $N_0=400 \text{ cm}^{-3}$ ; (b)  $N_0=1000 \text{ cm}^{-3}$ ; (c)  $N_0=2000 \text{ cm}^{-3}$ ; (d)  $N_0=4000 \text{ cm}^{-3}$ ;

19. **Section 3.3:** Is there any way to evaluate the modeling results and conclusions from this section? In your previous work (Yang et al., 2024), you included flashing rates observations. Were such observations available for the squall line discussed in this study?

Reply: Thank you for your comment. We are sorry for not having observed flash rate data using ground-based stations. However, the comparison of observed (from FY-4A satellite) and simulated lightning locations is shown in Figure 5 (Fig. R8 here) in the revised manuscript. The describes is as follows: “*In this paper, the observed lightning data are collected by the Lightning Mapping Imager (LMI), which is mounted on the second-generation Chinese geostationary meteorological satellite FY-4A to continuously detect lightning in China and its neighbouring areas. Additionally, the brightness temperature captured by FY-2H satellite is used to delineate the area of the deep convective cloud. Figure 5 shows the location of the lightning events observed by LMI and simulated in 4SIP-4000 experiment. It is evident that the simulated and observed lightning locations are in good agreement with each other and are both in the low brightness temperature region, which characterizes the presence of strong convection.*”

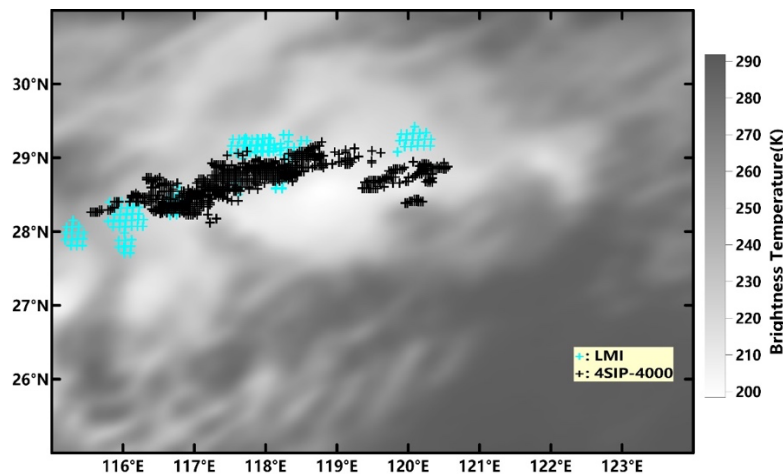

Figure R8. The simulated and observed lightning locations (sign “+”). The shaded field indicates brightness temperature.

20. **Lines 435-437:** Could you clarify the need to alter the "inverted tripole structure" of the total charge density? What is meant by "normal charge structure," and to which subplot in Figure 15 does this refer?

Reply: Thank you for your valuable comment. The normal charge structure has an upper positive charge region and a lower negative region and is shown in Fig. 16n and d in the original manuscript. Although we do not have observational data on the charge structure, the normal charge structure is more frequently observed in south China than inverted structure as shown by previous studies (Zhang et al., 1997).

#### References:

Zhang, Y., Liu, X., and Xiao, Q. : An analysis of characteristics of thunderstorm and artificially triggered lightning in the north and south of China, Plateau Meteorology, 2, 113–121,1997. (in Chinese)

21. **Lines 501-502:** To support your statement here, you should include a more extensive comparison and model evaluation against observations.

Reply: Thank you for your valuable comment. The statements have been added as follows: *“The 4SIP-4000 experiment is set as the control experiment. Comparison of simulated results and observation reveals that the mean absolute errors of reflectivity for the whole simulation area at 00:00,02:00 and 04:00 are 12 dBZ, 11 dBZ and 12 dBZ. The area where the radar reflectivity difference is less than 15 dBZ reaches 67%, 71%, and 67% at 00:00, 02:00 and 04:00, respectively. It is evident that the simulated and observed lightning locations are in good agreement with each other and are both in the low brightness temperature region, which characterizes the presence of strong convection. Besides, the total charge structure is sensitive to CCN concentration and SIP processes, and the cloud exhibited a dipole charge structure if considering all the SIP mechanisms and a CCN concentration close to the reality, which is frequently observed in south China (Zhang et al., 1997).”*

22. **Line 516:** Please revise this sentence, as the objective should be to align model simulations with observations, not to maximize ice splinter production. Similarly, the claim about the "incredibly important role" of SIP processes mentioned in Line 524 is not substantiated by your modeling results and lacks support from cloud microphysical measurements (e.g., ice crystal number concentrations, ice/liquid water content).

Reply: Thank you for your comment. According to another reviewer’s comment, the entire discussion section is rewritten:

*In this paper, aerosol concentrations from 400 to 4000 cm<sup>-3</sup> are considered, the results suggest generally a higher aerosol concentration leads to stronger charge separation, but the aerosol impact on cloud microphysics and electrification is not linear. This is also found in some previous studies, for example, Mansell and Ziegler (2013) tested 13 different aerosol concentrations from 50 to 8000 cm<sup>-3</sup> to investigate the effect of aerosols on storm electrification and precipitation. They found that the graupel concentration increases as the CCN concentration increases from 50 to 2000 cm<sup>-3</sup>, but slowly decreases as the CCN concentration increases from 2000 cm<sup>-3</sup>. Tan et al. (2015) designed simulation experiments with CCN concentrations from 50 to 10000 cm<sup>-3</sup>. They found that more cloud droplets, graupel, and ice crystal production lead to a stronger charge separation as aerosol concentration increases from 50 to 1000 cm<sup>-3</sup>. In contrast, as the aerosol concentration increases from 1000 to 3000 cm<sup>-3</sup>, the mixing ratio of ice crystals decreases, the noninductive charging is weakened, while the inductive charging rate has no significant change.*

*The stronger charge separation induced by higher aerosol concentration may modify the structure of total charge density. For example, Shi et al. (2019) found that the charge structure at different convective intensities (by controlling the environmental humidity and temperature stratification at an initial time) became more complex as the aerosol increased. Sun et al., (2024) showed that compared to the low aerosol concentration case, a notable inverted dipole charge structure was simulated in the high aerosol environment. The modelled charge structure in different cases may be different, depending on multiple factors such as the thermodynamic properties and liquid water content (Phillips and Patade, 2022; Zhao et al., 2020), and is possibly related to the different parameterizations of electrification used in various studies (Phillips and Patade, 2022). Nevertheless, all these studies, including the present paper, demonstrate the flash rate can be enhanced by higher aerosol concentration, which is regarded as a key explanation for the higher flash rate over continents than over ocean.*

*Previous studies have pointed out that the SIP processes strongly affect cloud microphysics and electrification (Waman et al., 2022; Huang et al., 2022; Phillips and Patade, 2022). In this study, we further show that the RS process is the most important one in an environment with high aerosol concentration, and the SD process is more important when the aerosol concentration is low. This conclusion is consistent with*

*previous studies which suggest the RS process can strongly affect the charge separation in continental thunderstorms (Huang et al. 2024; Yang et al. 2024), and the SD process may be a more efficient SIP mechanism in maritime convection, in which more supercooled rain drops are observed (Field et al., 2017). Phillips and Patade (2022) investigated a convective cloud with a cold base, they suggested the IC process is more active than the RS and SD process as the droplets are too small. In our case, the IC process is only efficient at temperatures colder than -10 °C in the mature stage. The sublimational breakup process has the least impact, which is also found in mature convective clouds simulated by Waman et al. (2022).*

*Regardless of the differences in various studies, it is commonly found that the aerosol concentration and SIP processes both have great impacts on cloud microphysics and electrification. An increase in aerosol concentration leads to a nonlinear enhancement of the charging rate. The RS process is the vital SIP process in a polluted environment, and the SD process is more important in a clean environment. Therefore, accurate representations of the various SIP processes under different aerosol conditions are important for the model simulation of lightning activities.*

**23. Data availability section:** The repository linked only provides the default WRF code, not the updated scheme developed and used in this study. Additionally, no sounding or lightning data has been used in this manuscript (Line 529), so please update the text here accordingly.

Reply: Thank you for your comment. The code of modified fast-SBM, and the data of sounding and lightning data are uploaded on Zenodo. The text is updated accordingly.

**Technical corrections:**

1. **Line 16:** Consider changing "eastward tendency" to "eastward propagation".

Reply: Thank you for your comment. The “eastward tendency” has been changed to “eastward propagation” in the revised manuscript.

2. **Line 37:** Change "The uncertainty in modeling the microphysics" to "The uncertainty in modeling cloud microphysics".

Reply: Thank you for your comment. The “The uncertainty in modeling the microphysics” has been changed to “The uncertainty in modeling cloud microphysics” in the revised manuscript.

3. **Line 39:** Did you mean "play a crucial role" in improving the accuracy of lightning prediction in numerical simulations?

Reply: Thank you for your comment. The “play a crucial role” means it has great impacts on cloud microphysics and electrification.

4. **Lines 45-46:** It would be helpful to add a few references to support this statement.

Reply: Thank you for your comment. The references that support this statement have been added in the revised manuscript.

5. **Line 60:** Change "remarkably ‘as’ CCN concentration increases".

Reply: Thank you for your comment. The “as” has been added in the revised manuscript.

6. **Line 65:** Remove "the" before "SIP processes" and "electrification".

Reply: Thank you for your comment. These two “the” have been deleted in the revised manuscript.

7. **Line 72:** Change to "And they found ‘that’ graupel-snow collisions".

Reply: Thank you for your comment. “that” have been added in the revised manuscript.

8. **Line 76:** Remove "the" in front of "SIP processes" and "ice generation".

Reply: Thank you for your comment. These two “the” have been deleted in the revised manuscript.

9. **Line 77:** Consider using "inverted tripole structure".

Reply: Thank you for your comment. The “inversed triple” has been changed as “inverted tripole structure” in the revised manuscript.

10. **Line 79:** Change "suggested the rime-splintering" to "suggesting that the rime-splintering".

Reply: Thank you for your comment. The “suggested the rime-splintering” has been changed to “suggesting that the rime-splintering” in the revised manuscript.

11. **Line 84:** I would suggest to use the plural form: "Observations and simulations".

Reply: Thank you for your comment. The “observation and simulation” has been changed to “observations and simulations” in the revised manuscript.

12. **Line 93:** "Model set-up" might be more accurate than "design".

Reply: Thank you for your comment. The “design” has been changed to “model set-up” in the revised manuscript.

13. **Line 105:** Swap the order of Figures 2 and 3 since you first refer to the figure with simulated reflectivities and then to the WRF domains.

Reply: Thank you for your comment. The description of reflectivity has been moved around Fig. 3.



14. **Line 118:** “Fast-SBM” has not yet been defined here.

Reply: Thank you for your comment. The definition has been added in the revised manuscript.

15. **Line 148:** Move the definition of SP98 here from Line 164.

Reply: Thank you for your comment. The definition has been moved in the revised manuscript.

16. **Line 154:** Did you mean "describe detailed discharge channels"? You might also use "sophisticated lightning models" instead of "elaborate".

Reply: Thank you for your comment. Yes, we mean "describe detailed discharge channels". The “elaborate” has been changed to “sophisticated” in the revised manuscript.

17. **Line 184:** “field” instead of “filed”.

Reply: Thank you for your comment. The “filed” has been corrected.

18. **Line 191:** “shortwave and longwave ‘spectra’”?

Reply: Thank you for your comment. The “shortwave and longwave” has been corrected as “shortwave and longwave radiation” in the revised manuscript.

19. **Line 228:** Remove "of" and consider providing a reference to support the statement.

Reply: Thank you for your comment. The “of” has been removed in the revised manuscript. Besides, references have been added to support the statement.

20. **Line 273:** Add the figure number you are referring to here (likely Fig. 6d).

Reply: Thank you for your comment. The figure number has been added to the revised manuscript.

21. **Line 308:** Replace "revolution" with "evolution".

Reply: Thank you for your comment. The “revolution” has been changed to “evolution” in the revised manuscript.

22. **Line 310:** Consider using "observation" instead of "phenomenon".

Reply: Thank you for your comment. In the manuscript, reference to “observation” generally denotes observation data, and the use of “observation” here may cause ambiguity. We changed “Another important phenomenon found in” to “Another important finding shown in”.

23. **Line 333:** Replace "revolution" with "evolution" and please mention that the results in this figure come from the sensitivity experiments accounting for all four SIP mechanisms.

Reply: Thank you for your comment. The “revolution” has been changed to “evolution”

in the revised manuscript. It has already been mentioned in manuscript that results come from the experiments considering four SIP processes.

24. **Line 350:** “collisions”

Reply: Thank you for your comment. The “collision” has been changed to “collisions” in the revised manuscript.

25. **Line 369:** This should be Fig. 111 if mentioned first.

Reply: Thank you for your comment. We are very sorry for this typing error. The “l” has been corrected to “c” in the revised manuscript.

26. **Line 399:** Use "level ‘that’ dominates the aerosol impact".

Reply: Thank you for your comment. The “that” has been added in the revised manuscript.

27. **Line 400:** Include the units for the RAR threshold of 0.1 mentioned here and consider providing a reference.

Reply: Thank you for your comment. The unit for the RAR and the reference has been added in the revised manuscript.

28. **Line 420:** “inverted tripole” structure?

Reply: Thank you for your comment. The “inverse triple” has been corrected as “inverted tripole” in the revised manuscript.

29. **Line 436:** “inverted tripole” structure?

Reply: Thank you for your comment. The “inverse triple” has been corrected as “inverted tripole” in the revised manuscript.

30. **Caption of Figure 15:** can you please update the text to define the abbreviations in the legend (scg, scsl, sctot)?

Reply: Thank you for your reminding. The “scg”, “scsi” and “sctot” have been defined in the revised manuscript.

31. **Line 449:** “increases”

Reply: Thank you for your comment. The “increase” has been changed to “increases” in the revised manuscript.

32. **Line 451:** Use “causes”, and did you mean “-20 °C” rather than “-30 °C” here?

Reply: Thank you for your comment. The “cause” has been changed to “causes” and “-30” has been changed to “-20” in the revised manuscript.

33. **Line 461:** squall “line”

Reply: Thank you for your comment. The “line” has been added in the revised manuscript.

34. **Line 470:** higher “cloud” levels

Reply: Thank you for your comment. The “cloud” has been added in the revised manuscript.

35. **Line 520:** Clarify what is meant by "different convective intensities".

Reply: Thank you for your comment. Shi et al. (2019) controlled different convective intensities by changing the environmental humidity and temperature stratification at an initial time.

36. **Line 521:** aerosol “concentration”

Reply: Thank you for your comment. The “concertation” has been changed to “concentration” in the revised manuscript.
